# Supplementary material for: Synthesis and photophysical properties of pyrene-based green fluorescent dyes: butterfly-shaped architectures
Source: Royal Society of Chemistry journal article supplement (doi:10.1039/c4ob01509f), 2014-01-01

**Electronic Supporting Information**  
**For**  
**Synthesis and Photophysical Properties of Pyrene-Based Green Fluorescent**  
**Dyes: Butterfly-Shaped Architectures**

**Devendar Goud Vanga, Mithun Santra, Ashok Keerthi and Suresh Valiyaveetil\***

*Department of Chemistry, National University of Singapore, 3 Science Drive 3, Singapore 117543, Singapore.*

**General Methods:**

<sup>1</sup>H NMR spectra were recorded on Bruker ACF300 (300 MHz) spectrometer. The chemical shifts were reported in ppm and referenced to the residual solvent peak. s = singlet, d = doublet, t = triplet, m = multiplet, b = broad. FAB-mass spectra were obtained on a Finnigan MAT95XL-T, MALDI-TOF on Bruker Autoflex III and Micromass VG7035 mass spectrometer. The UV-Vis and emission spectra were measured on a UV-1601PC Shimadzu spectrophotometer and RF-5301PC Shimadzu spectrofluorophotometer. Bruker ALPHA FT-IR Spectrophotometer was used for the Fourier transform infrared (FT-IR) spectroscopy analysis. Good quality crystal was obtained from a two-phase solvent system where the compound first was dissolved in a CHCl<sub>3</sub> and transferred in NMR tube. Next, hexane in which compound is not soluble, was poured slowly in such way that it form two solvent layers and it was kept for few days without disturbing until the crystal was obtained. The structure of the compound was determined by X-ray crystal diffraction. Geometry optimizations were performed in Gaussian 09 at the density functional theory (DFT) level with the B3LYP functional and a 6-31G(d) basis set. The HOMO and LUMO surfaces were generated from the optimized geometries using GaussView 5.

## General Procedure for palladium catalyzed cross-coupling reaction

A 50 mL Schlenk flask equipped with a stir bar was charged with compound 1,3,6,8-tetraethynyl pyrene **5**<sup>1</sup> (1 eq.), Iodo aryl derivative (5.0 eq.) and copper(I)iodide (0.4 eq.). The flask was placed under argon, and tetrakis(triphenylphosphine)palladium(0) (0.4 eq.) and K<sub>2</sub>CO<sub>3</sub> (5 eq.) were added under a nitrogen atmosphere. Tetrahydrofuran and diisopropylamine in 1: 3 ratio were added by syringe, the mixture was degassed for 20 min, and heated at 90°C for 12 hours. The reaction mixture was cooled, diluted with water, and extracted with EtOAc. The organic layer was washed with brine, dried over anhyd. Na<sub>2</sub>SO<sub>4</sub>, filtered, concentrated, and purified on a silica gel column to afford the target compound.

## Synthetic Procedure:

### 1,3,6,8-tetrakis(5-tert-butylbenzofuran-2-yl)pyrene (**1**).

Compound **5**<sup>1</sup> and **6**<sup>2</sup> were synthesized according to the literature procedure.

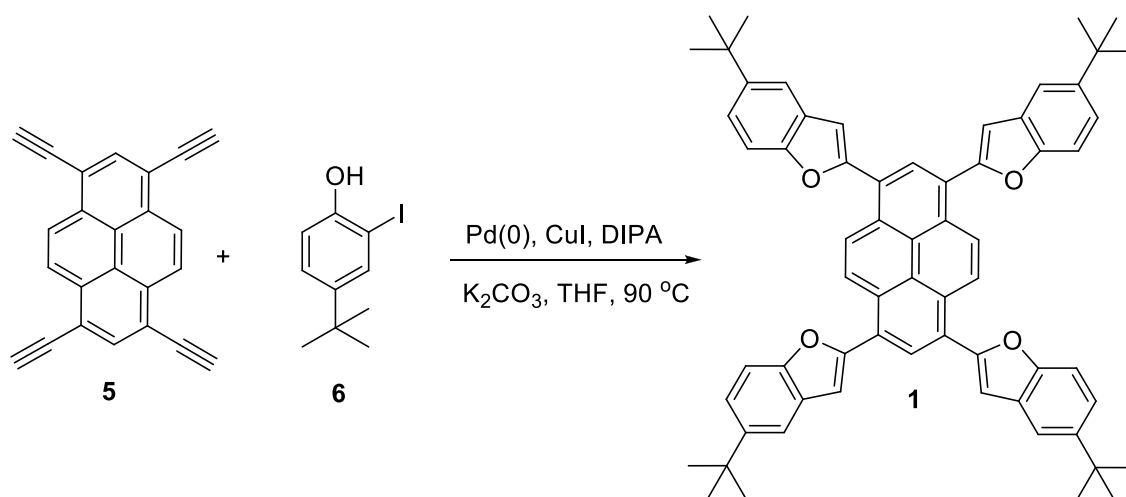

Following the general procedure for palladium catalyzed cross-coupling reaction, starting from 1,3,6,8-tetraethynyl pyrene **5** (0.3 g, 1 mmol), 4-*tert*-butyl-2-Iodophenol **6** (1.38 g, 5

mmol) and copper(I)iodide (0.076 g, 0.4 mmol), tetrakis(triphenylphosphine)palladium(0) (0.46 g, 0.4 mmol) and K<sub>2</sub>CO<sub>3</sub> (0.69 g, 5 mmol), the compound **1** (0.63 g, 71%) was afforded as a orange solid after silica gel flash column chromatography (5% ethylacetate in hexanes). *R<sub>f</sub>* = 0.8 (1:9 ethyl acetate/hexanes); <sup>1</sup>H NMR (300 MHz, CDCl<sub>3</sub>): δ 8.80 (s, 3H, Ar), 8.75 (s, 2H, Ar), 7.76 (d, *J* = 1.8 Hz, 4H, Ar), 7.60 (d, *J* = 8.5 Hz, 4H, Ar), 7.50 (dd, *J* = 1.8, 8.5 Hz, 4H, Ar), 7.28 (s, 4H, Ar), 1.49 (s, 36H); <sup>13</sup>C NMR (75 MHz, CDCl<sub>3</sub>): δ 155.4, 153.5, 146.2, 128.8, 128.2, 127.6, 126.1, 125.8, 125.7, 122.6, 117.3, 110.7, 107.5, 34.8, 31.9; MALDI-TOF: (C<sub>64</sub>H<sub>58</sub>O<sub>4</sub>) Calculated *m/z* = 890.43, Found *m/z* = 890.73; IR (KBr): ν = 2958, 2925, 1858, 1464, 1264, 1092, 1024, 805.

**2,2',2'',2'''-(pyrene-1,3,6,8-tetrayltetrakis(ethyne-2,1-diyl))tetrakis(4-tert-butylbenzene-2,1-diyl) tetraacetate (2).**

Compound **7**<sup>2</sup> was synthesized by following the literature procedure.

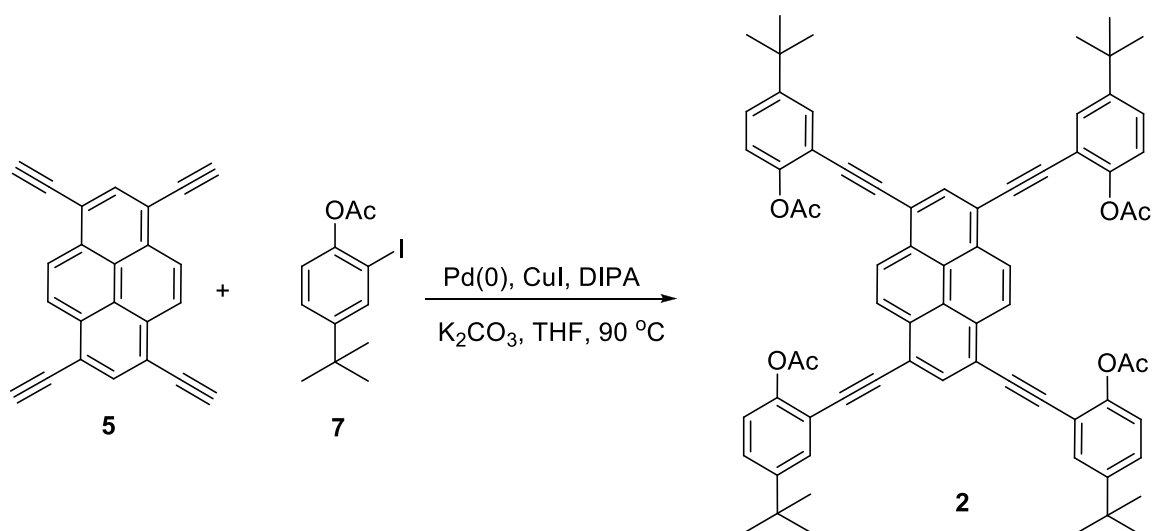

Following the general procedure for palladium catalyzed cross-coupling reaction, starting from 1,3,6,8-tetraethynyl pyrene **5** (0.3 g, 1 mmol), 4-*tert*-butyl-2-iodophenyl acetate **7**

(1.59 g, 5 mmol) and copper(I)iodide (0.076 g, 0.4 mmol), tetrakis(triphenylphosphine)palladium(0) (0.46 g, 0.4 mmol) and K<sub>2</sub>CO<sub>3</sub> (0.69 g, 5 mmol), the compound **2** (0.83 g, 79%) was afforded as a orange-yellow solid after silica gel flash column chromatography (25% ethylacetate in hexanes). *R<sub>f</sub>* = 0.4 (2:8 ethyl acetate/hexanes); <sup>1</sup>H NMR (300 MHz, CDCl<sub>3</sub>): δ 8.77 (s, 4H, Ar), 8.44 (s, 2H, Ar), 7.77 (d, *J* = 2.5 Hz, 4H, Ar), 7.48 (dd, *J* = 2.5, 8.5 Hz, 4H, Ar), 7.15 (d, *J* = 8.5 Hz, 4H, Ar), 2.46 (s, 12H), 1.40 (s, 36H); <sup>13</sup>C NMR (75 MHz, CDCl<sub>3</sub>): δ 169.2, 149.3, 149.1, 133.7, 131.8, 130.1, 127.3, 126.9, 121.8, 118.9, 116.3, 91.7, 91.4, 34.5, 31.3, 21.1.; MALDI-TOF: (C<sub>72</sub>H<sub>66</sub>O<sub>8</sub>) Calculated *m/z* = 1058.47, Found *m/z* = 1058.78; IR (KBr): ν = 3054, 2959, 2925, 2865, 2205 (—C≡C—), 1766, 1603, 1498, 1366, 1185.

**2,2',2'',2'''-(pyrene-1,3,6,8-tetrayltetrakis(ethyne-2,1-diyl))tetrakis(4-tert-butylaniline) (3).**

Compound **8**<sup>3</sup> was synthesized according to the literature procedure.

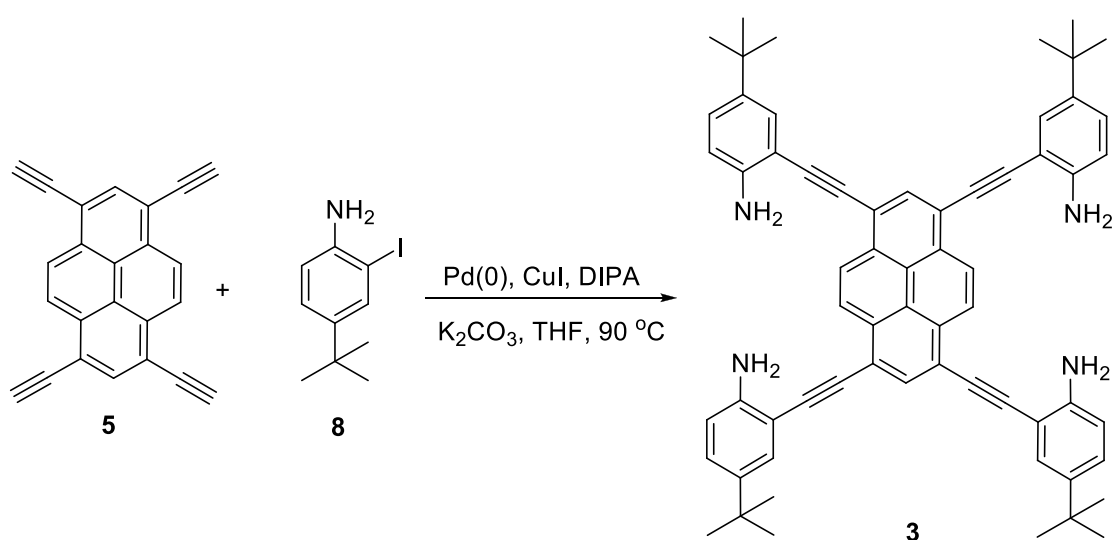

Following the general procedure for palladium catalyzed cross-coupling reaction, starting

from 1,3,6,8-tetraethynyl pyrene **5** (0.3 g, 1 mmol), 4-*tert*-butyl-2-iodoaniline **8** (1.37 g, 5 mmol) and copper(I)iodide (0.076 g, 0.4 mmol), tetrakis(triphenylphosphine)palladium(0) (0.46 g, 0.4 mmol) and K<sub>2</sub>CO<sub>3</sub> (0.69 g, 5 mmol), the compound **2** (0.74 g, 83%) was afforded as a red solid after silica gel flash column chromatography (25% ethylacetate in hexanes). *R<sub>f</sub>* = 0.5 (2:8 ethyl acetate/hexanes); <sup>1</sup>H NMR (300 MHz, acetone-d<sub>6</sub>): δ 8.83 (s, 4H, Ar), 8.60 (s, 2H, Ar), 7.59 (d, *J* = 2.3 Hz, 4H, Ar), 7.29 (dd, *J* = 2.3, 8.5 Hz, 4H, Ar), 6.85 (d, *J* = 8.5 Hz, 4H, Ar), 5.24 (s, 6H, NH<sub>2</sub>), 1.34 (s, 36H); <sup>13</sup>C NMR (75 MHz, acetone-d<sub>6</sub>): δ 149.1, 140.9, 135.1, 132.4, 130.1, 129.3, 128.3, 125.6, 121.1, 115.9, 107.6, 96.1, 93.2, 35.1, 32.5; MALDI-TOF: (C<sub>64</sub>H<sub>62</sub>N<sub>4</sub>) Calculated *m/z* = 886.50, Found *m/z* = 886.74; IR (KBr): ν = 3609, 3471, 3382 (NH<sub>2</sub>), 2955, 2862, 2363, 2186 (—C≡C—), 1616, 1498, 1258, 822.

**1,3,6,8-tetrakis(5-*tert*-butyl-1H-indol-2-yl)pyrene (**4**):**

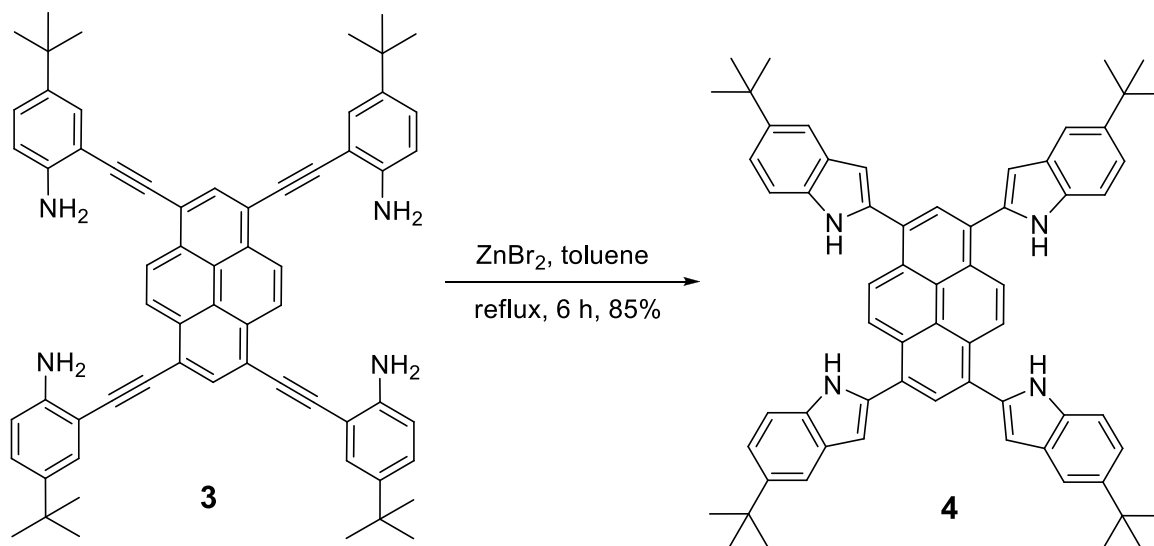

To a solution of chromophore **3** (0.1 g, 0.112 mmol) dissolved in dry toluene (10 mL) was added anh.ZnBr<sub>2</sub> (0.2 g, 0.90 mmol) at RT under nitrogen atmosphere. The reaction mixture was refluxed for 6 h, cooled to RT, the solvent was removed under *vacuo* and the crude was

subjected to silicagel column chromatography to give orange-brown solid compound **4** (0.085 g, 85%).  $R_f = 0.5$  (1:3 ethyl acetate/hexanes);  $^1\text{H}$  NMR (300 MHz, acetone- $\text{d}_6$ ):  $\delta$  10.71 (s, 4H, NH), 8.83 (s, 4H), 8.54 (s, 2H), 7.74 (s, 4H), 7.48 (d,  $J = 8.5$  Hz, 4H), 7.36 (d,  $J = 8.5$  Hz, 4H), 7.01 (s, 4H), 1.44 (s, 36H);  $^{13}\text{C}$  NMR (75 MHz, acetone- $\text{d}_6$ ):  $\delta$  142.3, 136.6, 129.0, 128.7, 128.0, 125.7, 120.3, 116.1, 110.7, 104.5, 34.2, 31.3; MALDI-TOF: ( $\text{C}_{64}\text{H}_{62}\text{N}_4$ ) Calculated  $m/z = 886.50$ , Found  $m/z = 886.46$ ; IR (KBr):  $\nu = 3394, 3055, 2956, 2865, 1609, 1468, 1403, 1311, 1142, 802\text{ cm}^{-1}$ .

## References

1. (a) S. Bernhardt, M. Kastler, V. Enkelmann, M. Baumgarten and K. Müllen, *Chem. Eur. J.* 2006, **12**, 6117–6128; (b) H. Lu, Q. Wang, Z. Li, G. Lai, J. Jiang, and Z. Shen, *Org. Biomol. Chem.*, 2011, **9**, 4558–4562.
2. T. Wang, Z.Y. Li, A. L. Xie, X. J. Yao, X. P. Cao and D. Kuck, *J. Org. Chem.* 2011, **76**, 3231–3238.
3. (a) W.-W. Sy, *Synth. Commun.* 1992, **22**, 3215–3219; (b) J. Iskra, S. Starber and M. Zupam, *Synthesis*, 2004, 1869–1879.

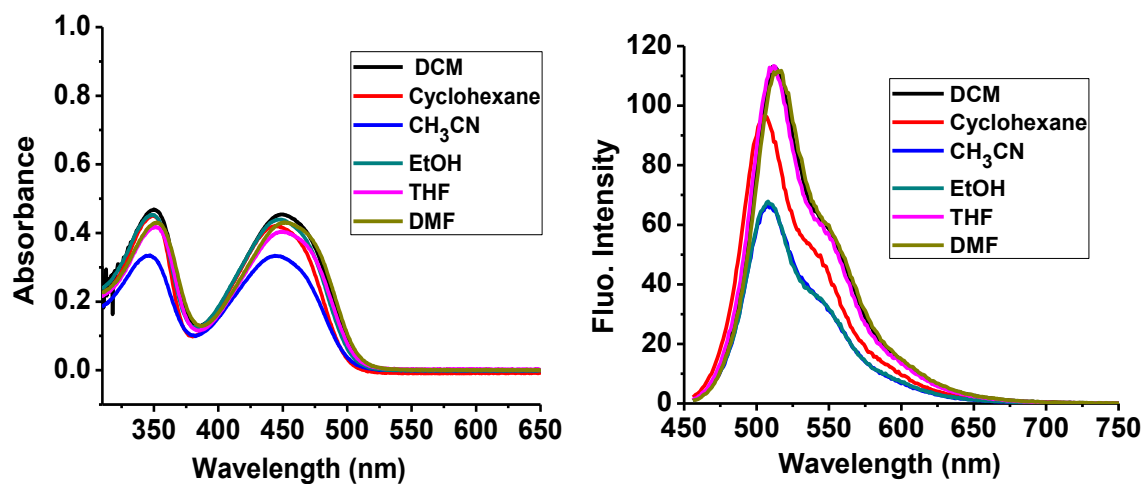

**Figure S1.** Absorbance in 10  $\mu$ M (left) and normalized fluorescence (right) in 1  $\mu$ M of compound **1**, recorded in different organic solvent.

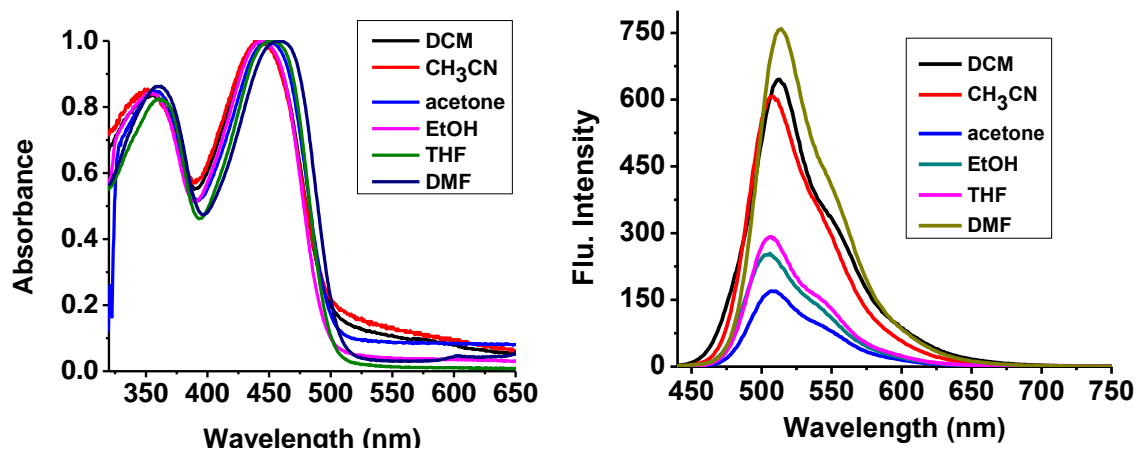

**Figure S2.** Absorbance in 10  $\mu$ M (left) and normalized fluorescence (right) in 1  $\mu$ M of compound **4**, recorded in different organic solvent.

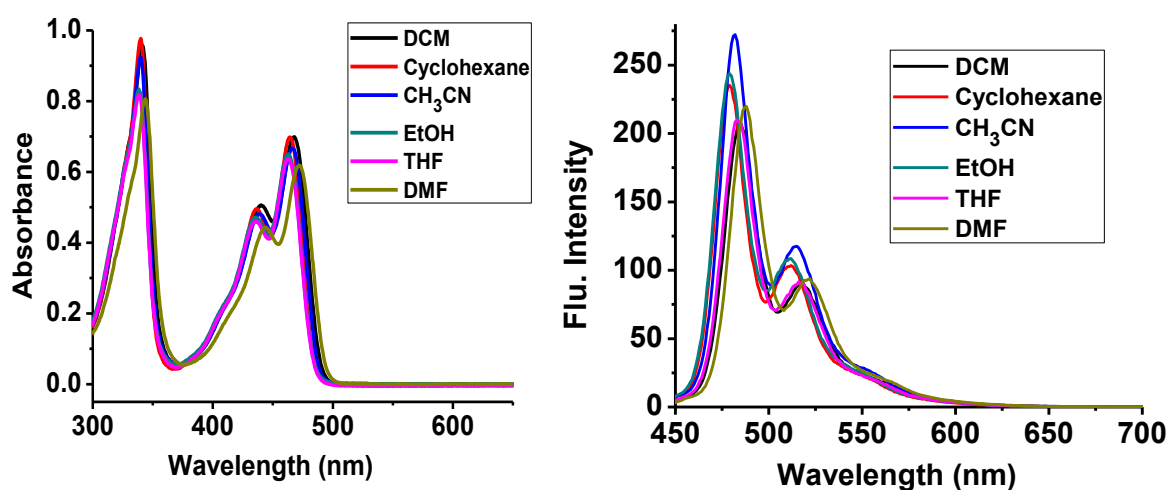

**Figure S3.** Absorbance spectra (left) and normalized fluorescence emission spectra (right) in different solvent system for compound **2** recorded at 25 °C.

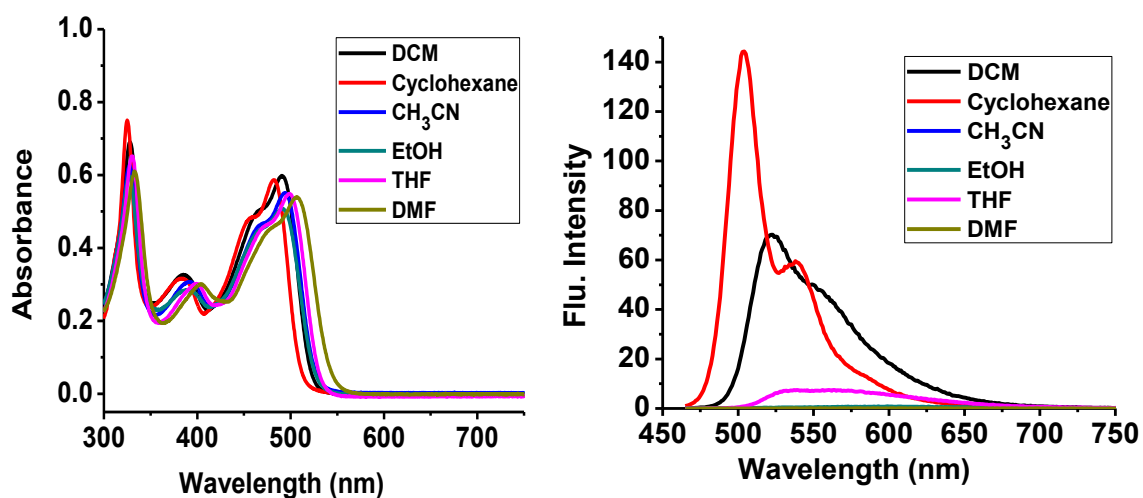

**Figure S4.** Absorbance spectra (left) and normalized fluorescence emission spectra (right) in different solvent system for compound **3** recorded at 25 °C.



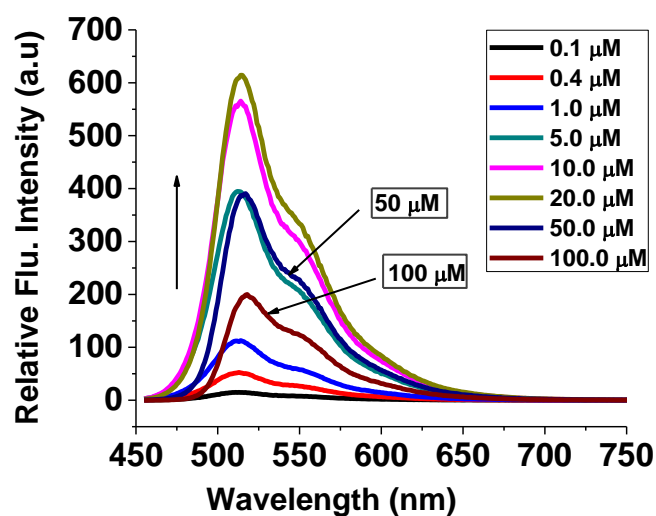

**Figure S5.** Effect of concentration on the fluorescence spectra for compound **1**, recorded in  $\text{CH}_2\text{Cl}_2$  at 25  $^\circ\text{C}$  upon increasing the concentration from 0.1  $\mu\text{M}$  to 100  $\mu\text{M}$ .

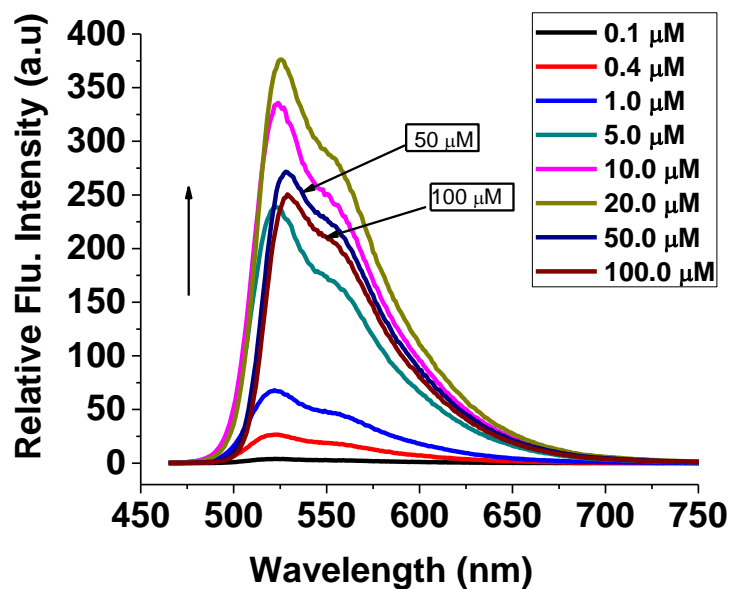

**Figure S6.** Effect of concentration on the fluorescence spectra for compound **3**, recorded in  $\text{CH}_2\text{Cl}_2$  at 25  $^\circ\text{C}$  upon increasing the concentration from 0.1  $\mu\text{M}$  to 100  $\mu\text{M}$ .

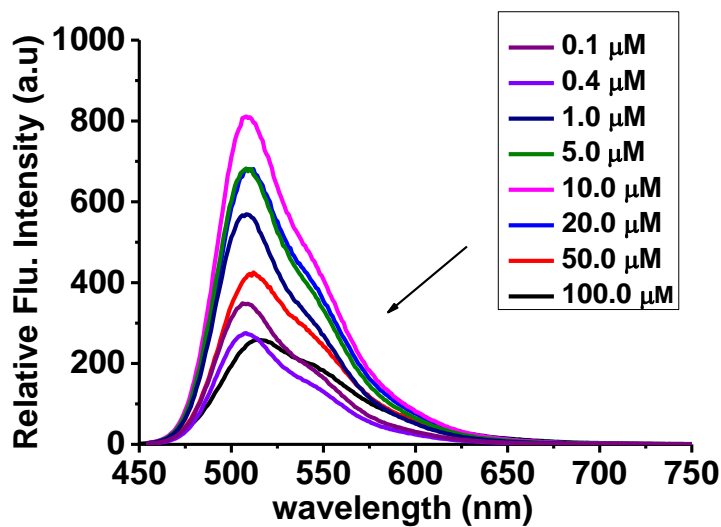

**Figure S7.** Effect of concentration on the fluorescence spectra for compound **4**, recorded in CH<sub>2</sub>Cl<sub>2</sub> at 25 °C upon increasing the concentration from 0.1 μM to 100 μM.

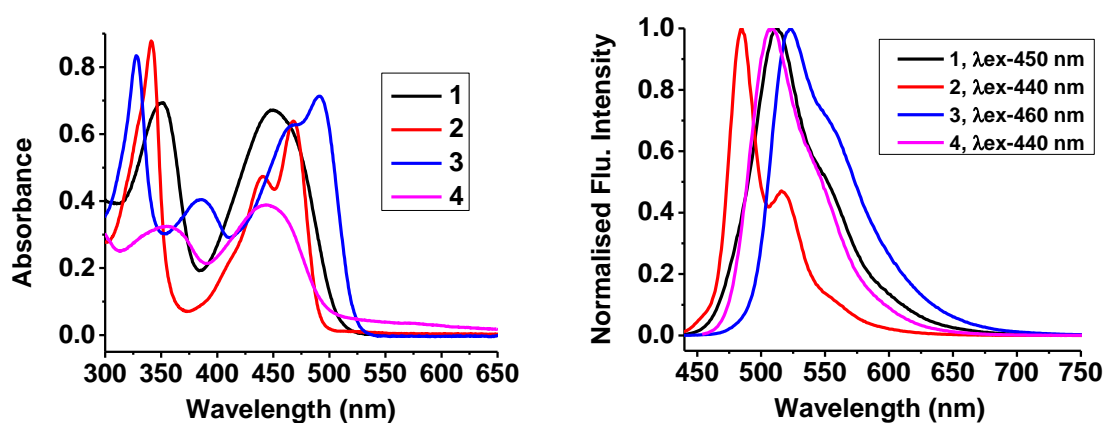

**Figure S8.** Absorbance in 10 μM (left) and normalized fluorescence in 1 μM of 1, 2, 3 and 4 recorded in CH<sub>2</sub>Cl<sub>2</sub> solvent.

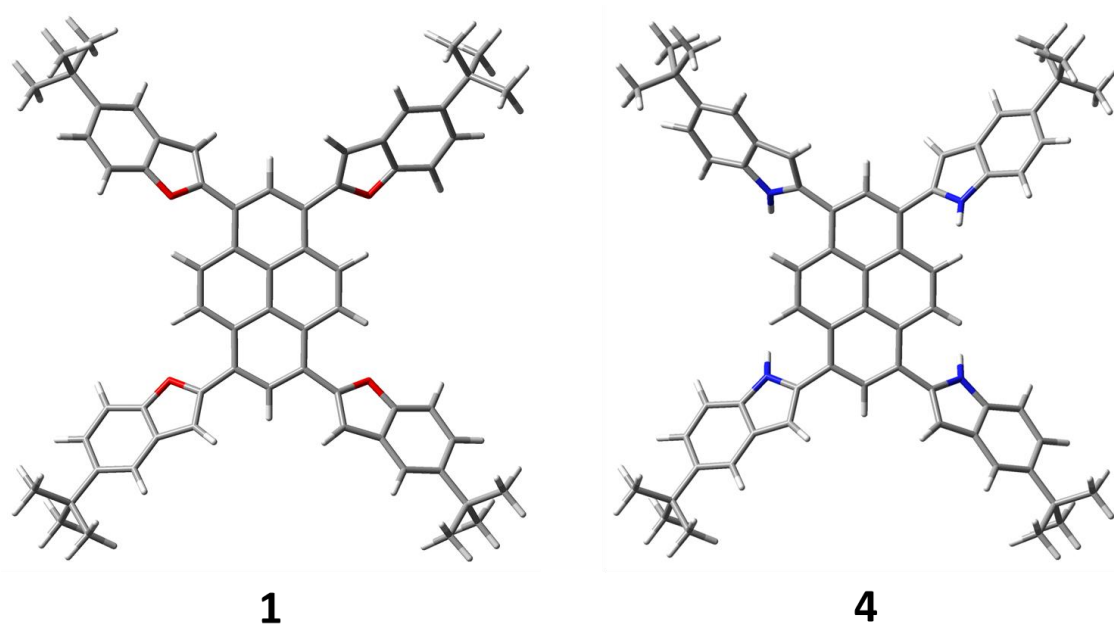

**Figure S9.** The energy optimized structure of **1** and **4** molecules calculated by density functional theory at the B3LYP/6-31G(d) level.

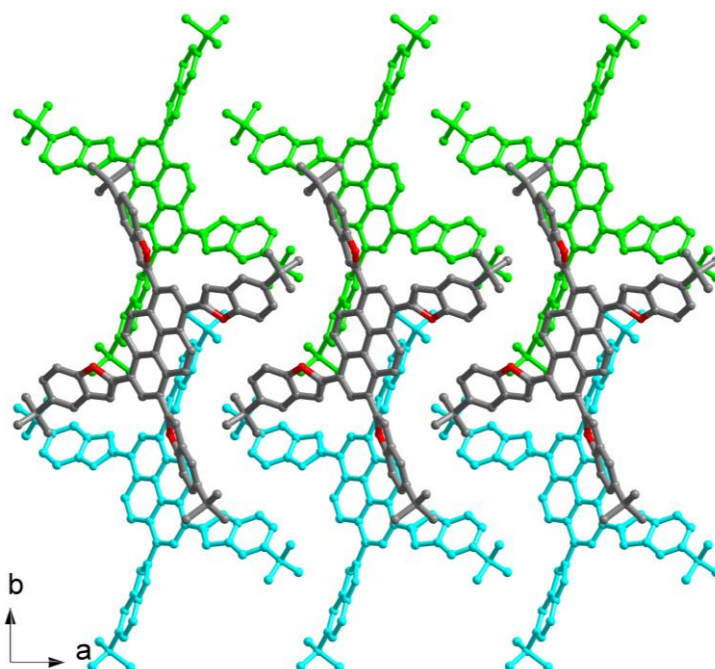

**Figure S10.** ORTEP representation of molecular packing viewed down the c axis of compound **1**

**Table 1.** Crystal data and structure refinement for D368N (**1**).

|                                   |                                                |                 |
|-----------------------------------|------------------------------------------------|-----------------|
| Identification code               | d368n                                          |                 |
| Empirical formula                 | C <sub>64</sub> H <sub>58</sub> O <sub>4</sub> |                 |
| Formula weight                    | 891.10                                         |                 |
| Temperature                       | 100(2) K                                       |                 |
| Wavelength                        | 0.71073 Å                                      |                 |
| Crystal system                    | Monoclinic                                     |                 |
| Space group                       | P2(1)/c                                        |                 |
| Unit cell dimensions              | a = 12.291(2) Å                                | α = 90°.        |
|                                   | b = 17.310(3) Å                                | β = 95.536(5)°. |
|                                   | c = 11.563(2) Å                                | γ = 90°.        |
| Volume                            | 2448.7(8) Å <sup>3</sup>                       |                 |
| Z                                 | 2                                              |                 |
| Density (calculated)              | 1.209 Mg/m <sup>3</sup>                        |                 |
| Absorption coefficient            | 0.074 mm <sup>-1</sup>                         |                 |
| F(000)                            | 948                                            |                 |
| Crystal size                      | 0.46 x 0.26 x 0.10 mm <sup>3</sup>             |                 |
| Theta range for data collection   | 1.66 to 25.00°.                                |                 |
| Index ranges                      | -13 ≤ h ≤ 14, -18 ≤ k ≤ 20, -13 ≤ l ≤ 10       |                 |
| Reflections collected             | 14069                                          |                 |
| Independent reflections           | 4314 [R(int) = 0.0543]                         |                 |
| Completeness to theta = 25.00°    | 100.0 %                                        |                 |
| Absorption correction             | Semi-empirical from equivalents                |                 |
| Max. and min. transmission        | 0.7456 and 0.6393                              |                 |
| Refinement method                 | Full-matrix least-squares on F <sup>2</sup>    |                 |
| Data / restraints / parameters    | 4314 / 127 / 351                               |                 |
| Goodness-of-fit on F <sup>2</sup> | 1.029                                          |                 |
| Final R indices [I > 2σ(I)]       | R1 = 0.0775, wR2 = 0.1815                      |                 |
| R indices (all data)              | R1 = 0.1044, wR2 = 0.1964                      |                 |
| Largest diff. peak and hole       | 0.583 and -0.458 e.Å <sup>-3</sup>             |                 |

| compd | CHCl <sub>3</sub> | EtOH | THF  | DMSO |
|-------|-------------------|------|------|------|
| 1     | 0.80              | 0.78 | 0.81 | 0.74 |
| 2     | 0.89              | 0.61 | 0.84 | 0.69 |
| 3     | 0.64              | 0.20 | 0.40 | 0.04 |
| 4     | 0.74              | 0.59 | 0.73 | 0.66 |

**Table 2:** Quantum yields of compounds **1**, **2**, **3**, and **4** measured in CHCl<sub>3</sub>, EtOH, THF, and DMSO solvents

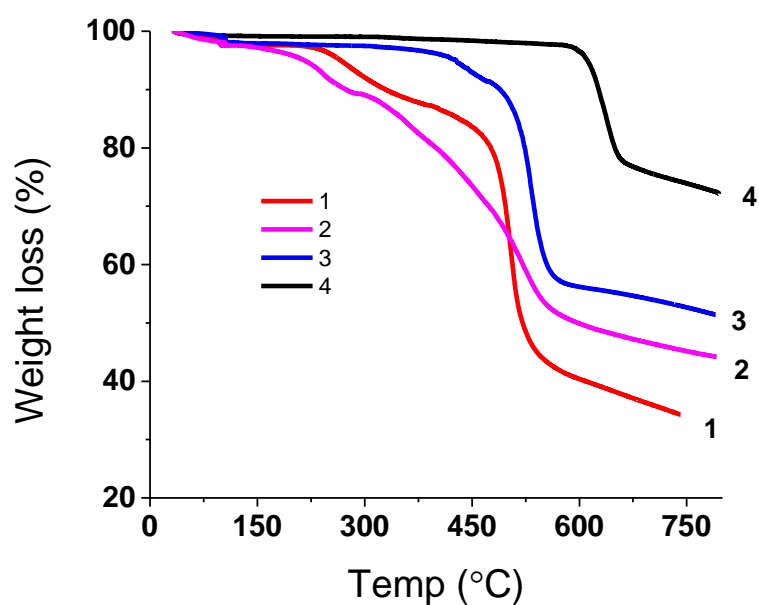

**Figure S11.** Thermogravimetry analysis for compound **1**, **2**, **3** and **4**

| Fluorophores                                                                          | Decomposition temperature <sup>a</sup> °C |
|---------------------------------------------------------------------------------------|-------------------------------------------|
| 1                                                                                     | 320                                       |
| 2                                                                                     | 264                                       |
| 3                                                                                     | 480                                       |
| 4                                                                                     | 625                                       |
| <sup>a</sup> Decomposition temperature was measured at 10% weight loss of fluorophore |                                           |

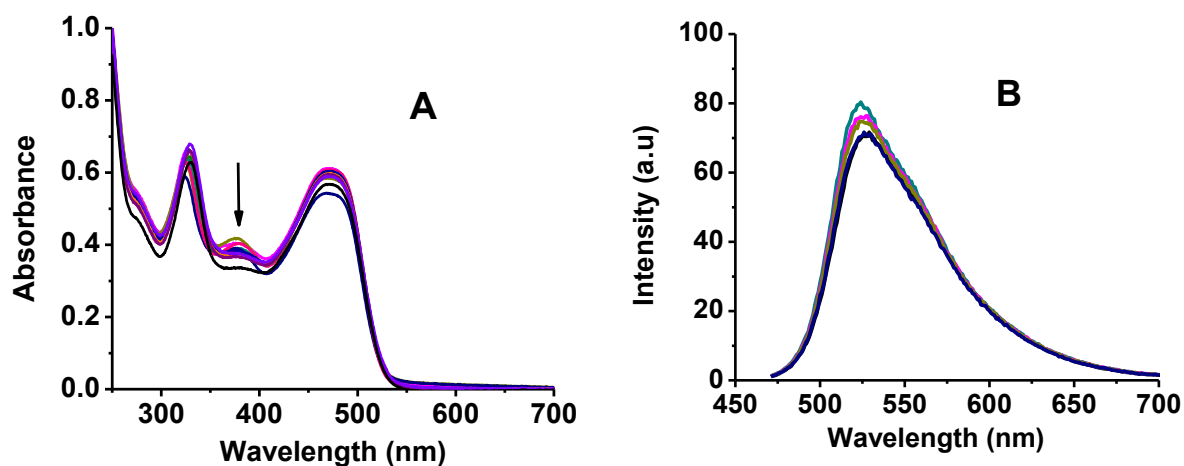

Fig.12. The absorption (A) and emission spectra (B) of compound **3** (10  $\mu\text{M}$ ) in the presence of  $\text{H}^+$  ions in EtOH. Compound **3** was titrated with acid from pH 6, 5, 4, 3, and 2 (No changes were observed)

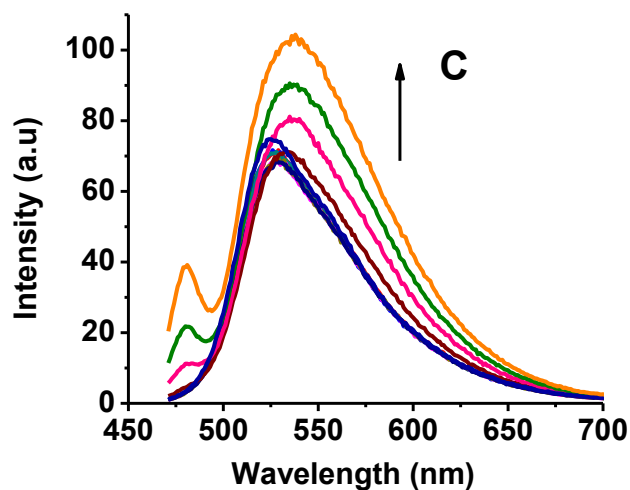

Fig.13. The emission spectra (C) of compound **3** (10  $\mu\text{M}$ ) in the presence of  $\text{H}^+$  ions in EtOH. Compound **3** was titrated with acid from pH 2, 1.8, 1.6, 1.4, 1.2, 1, 0.8, 0.6, and 0.2 respectively. (Changes were observed)

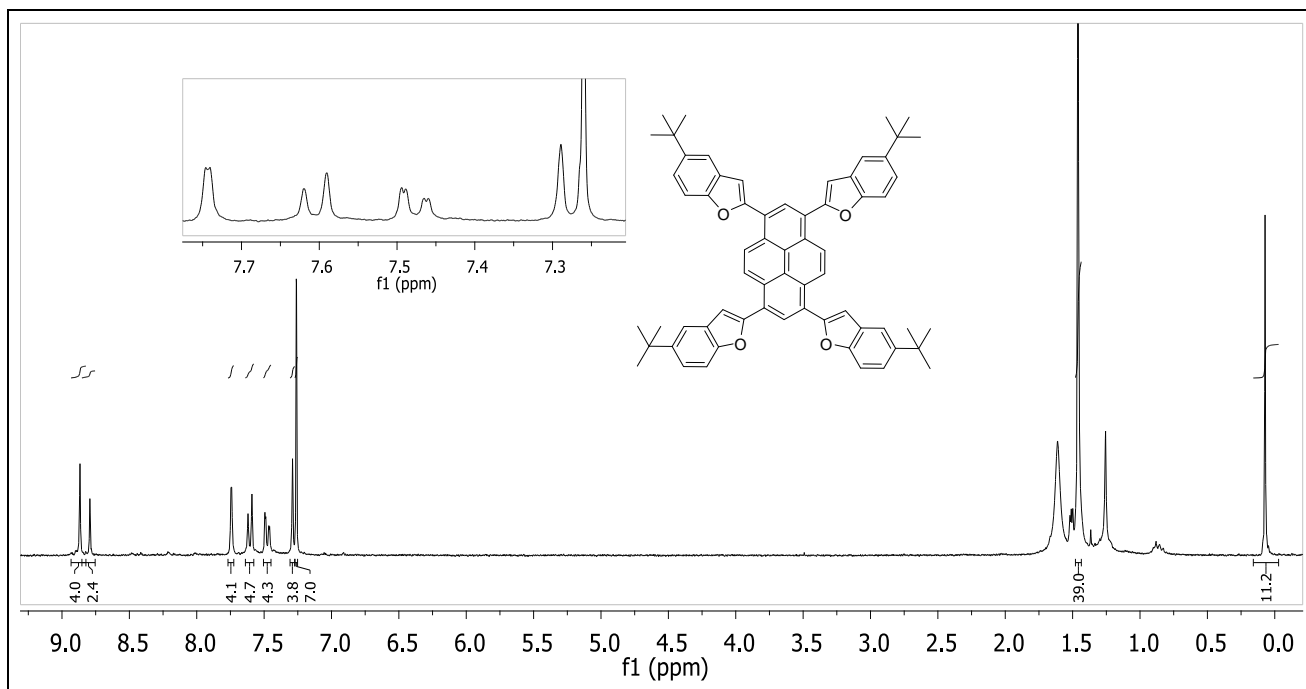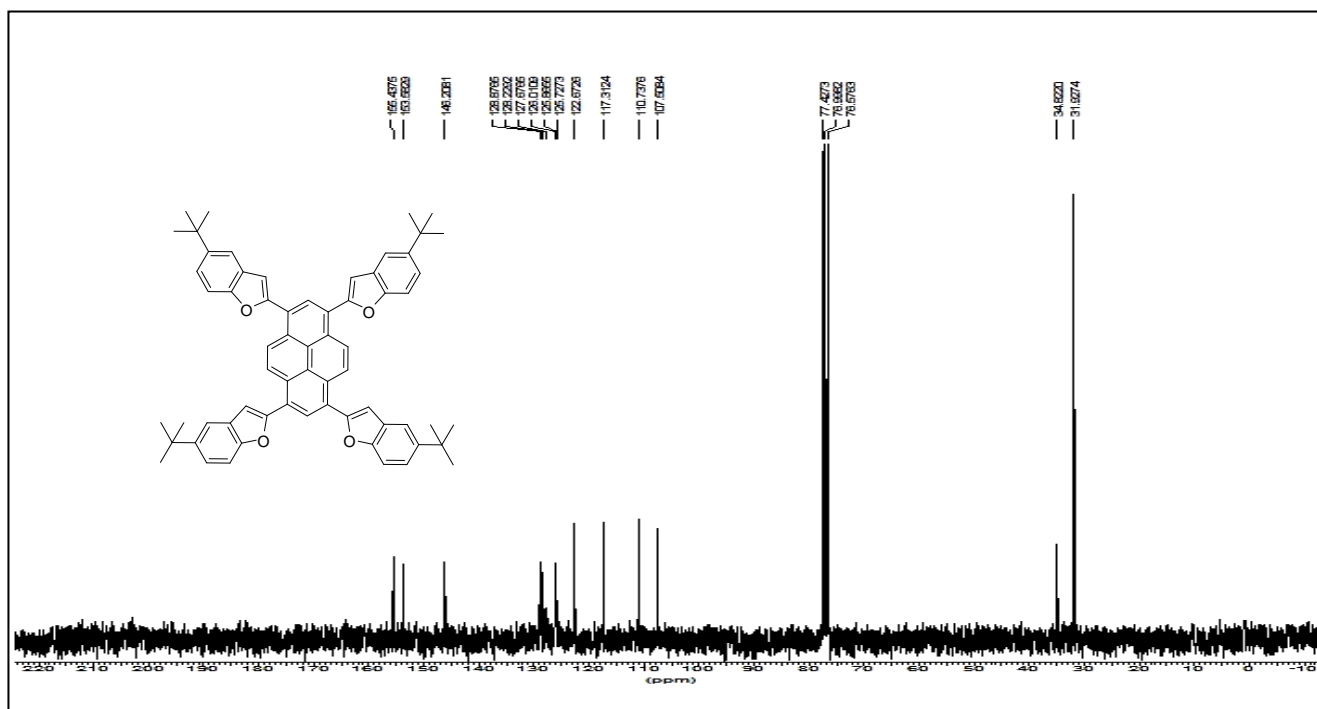

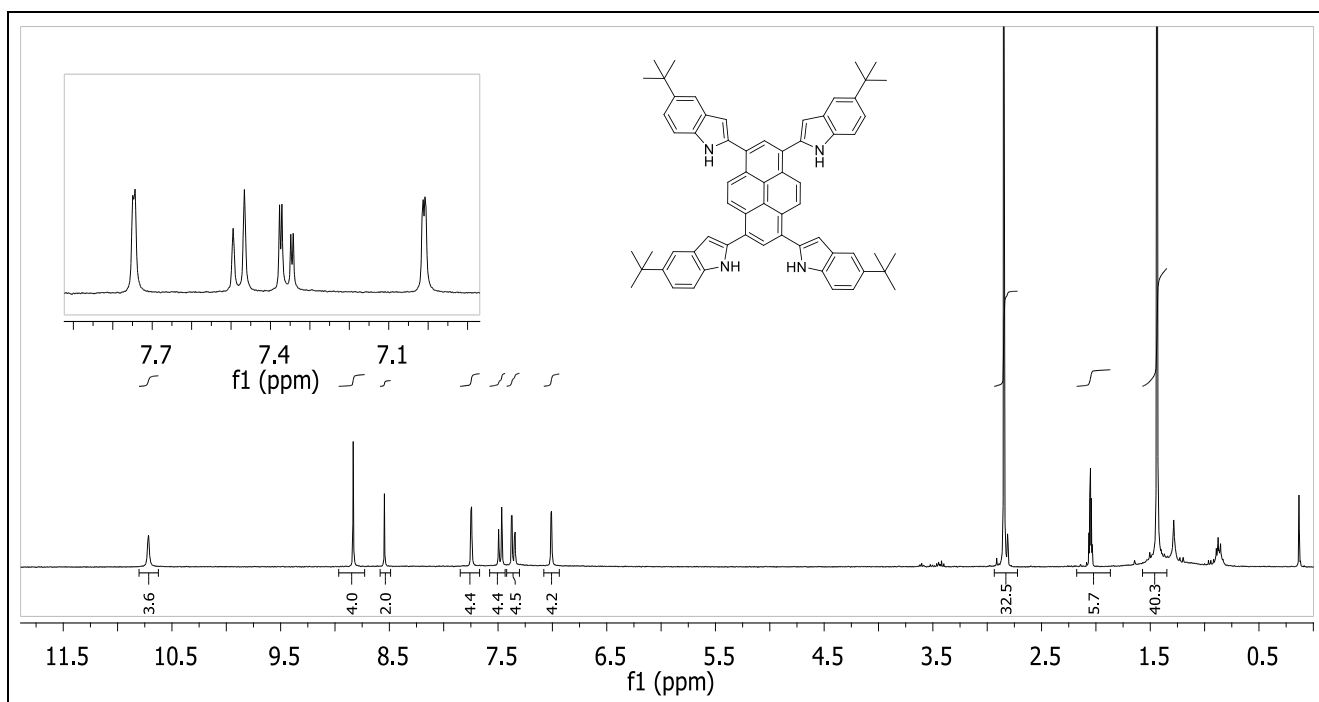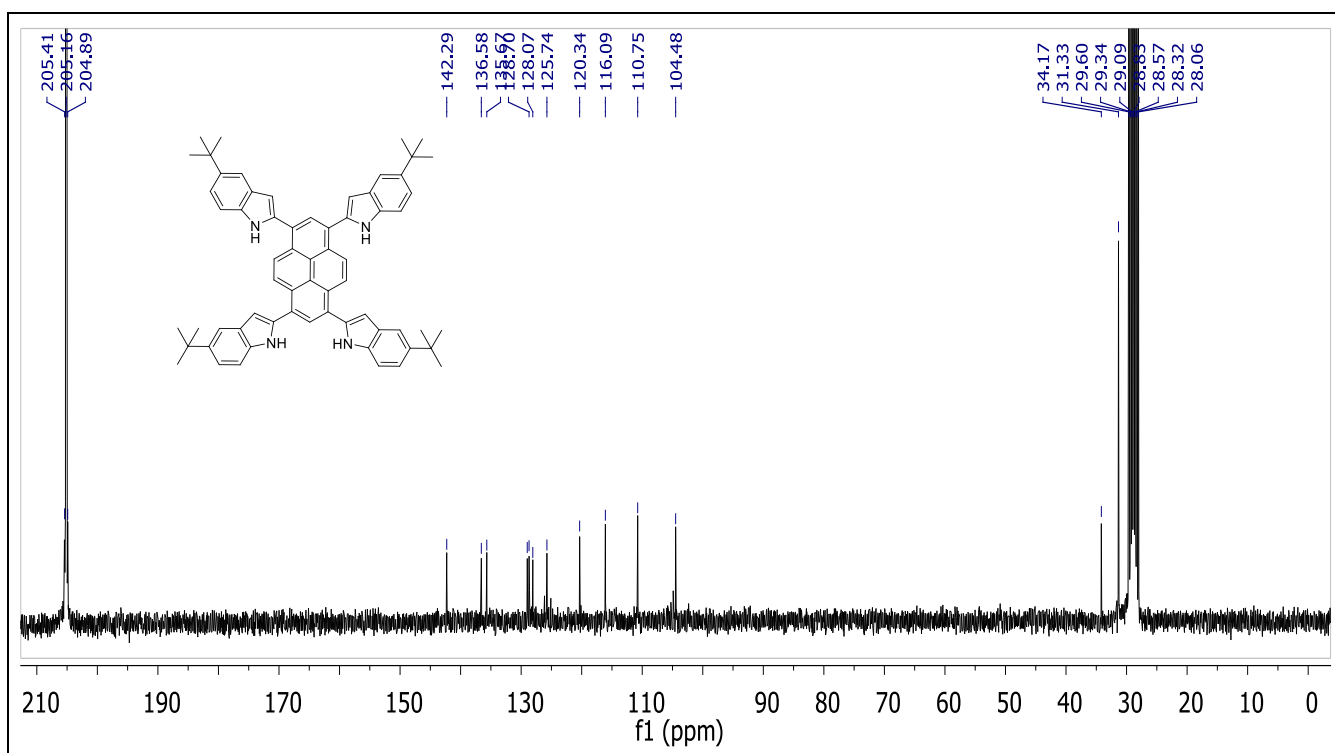



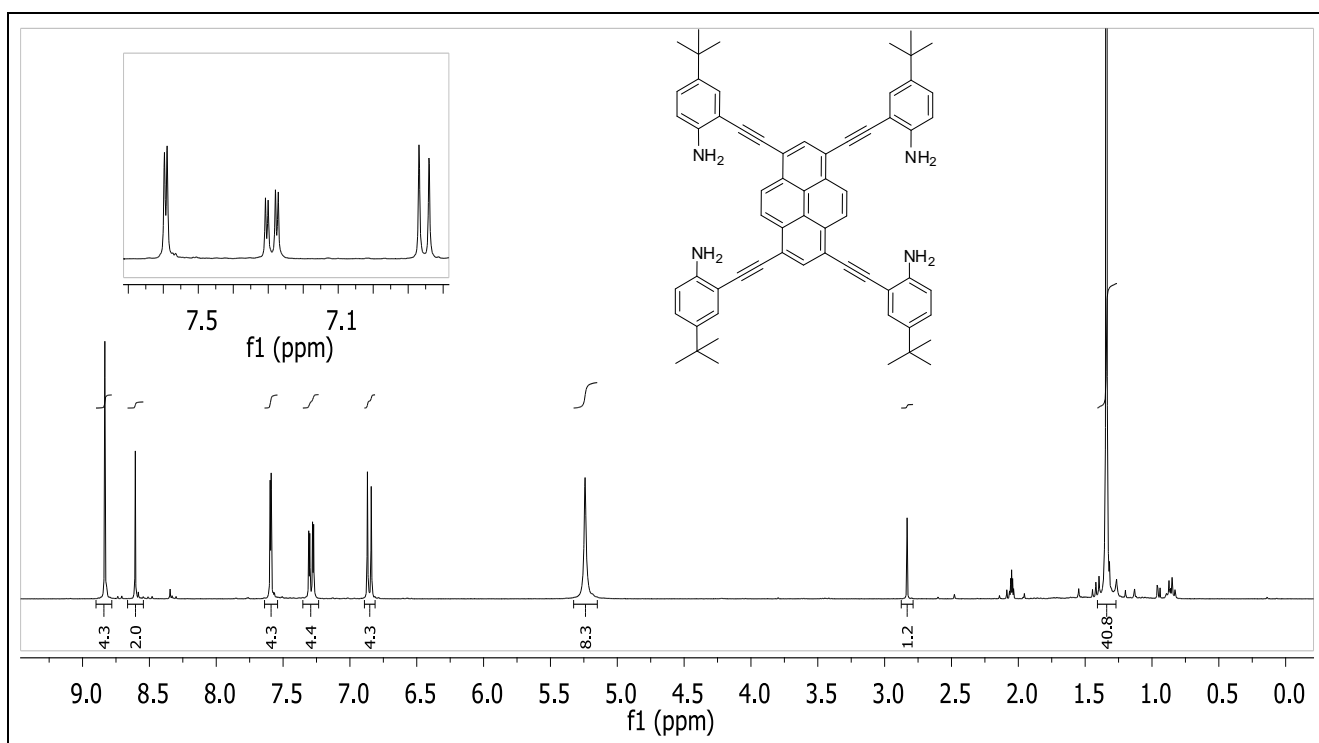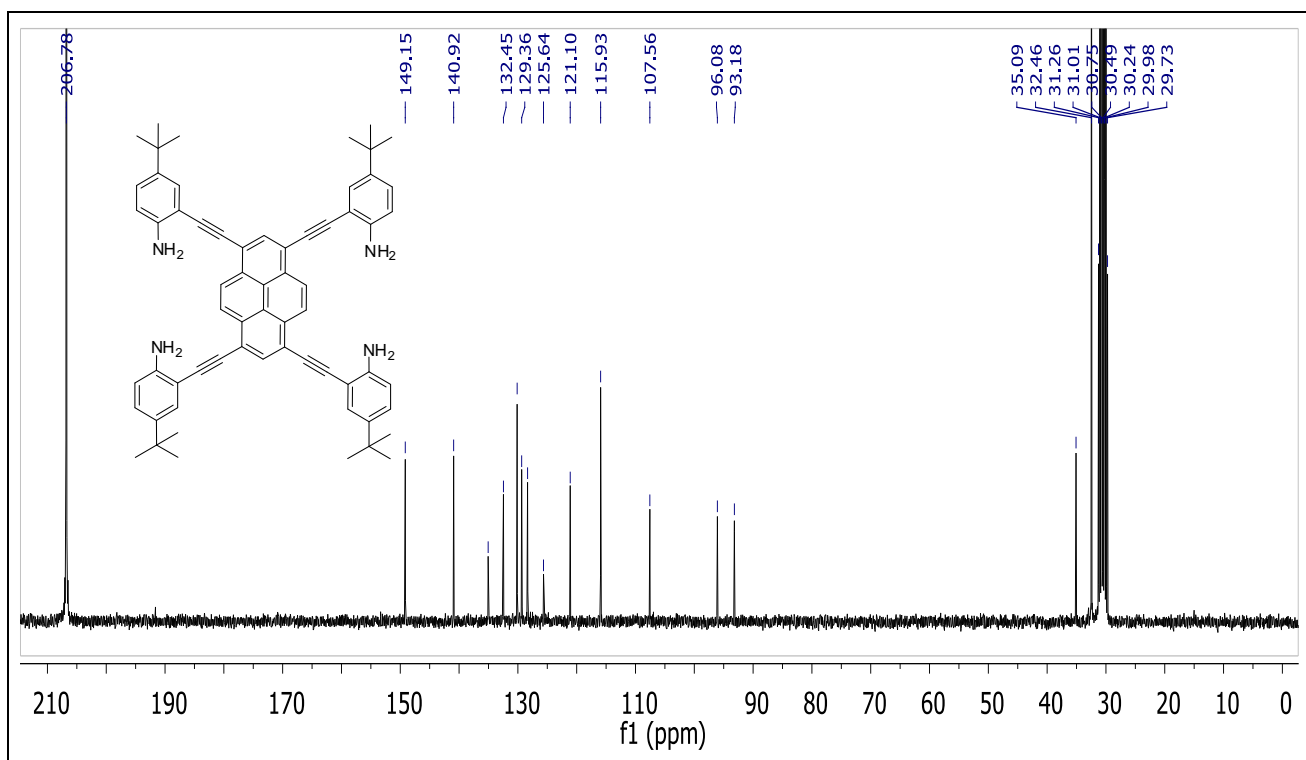

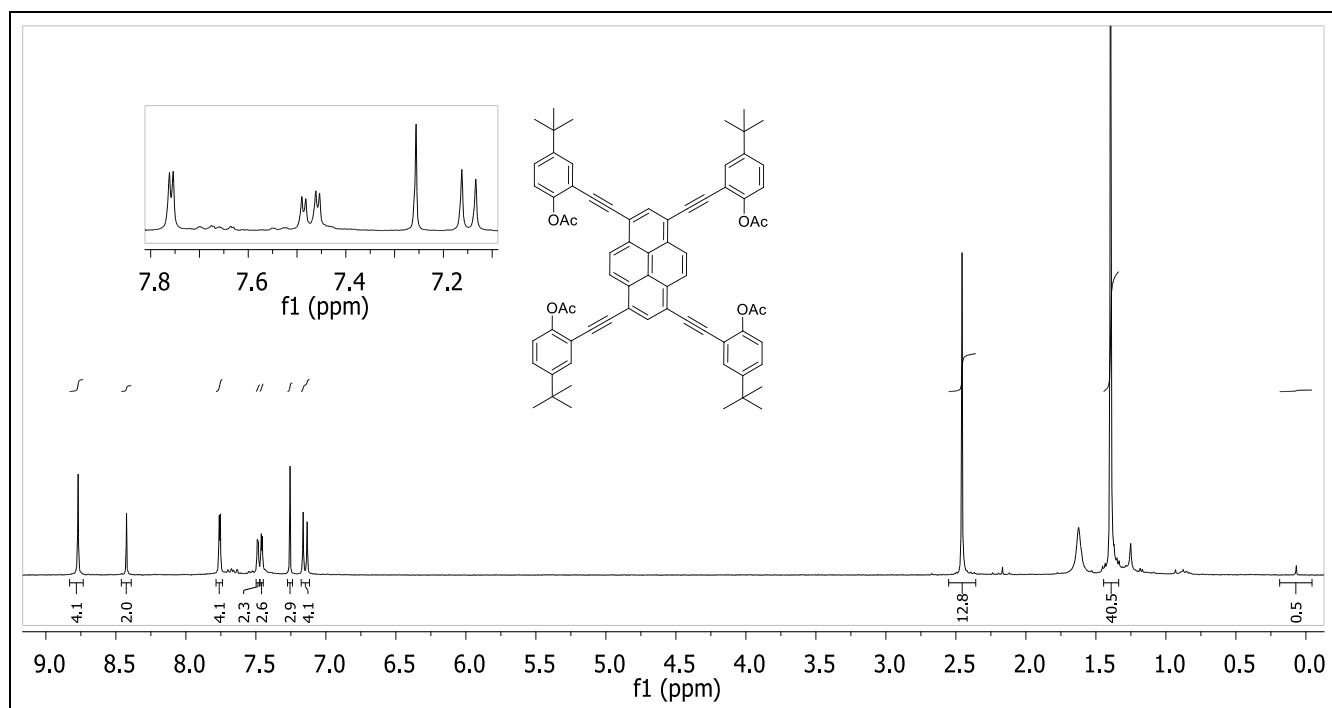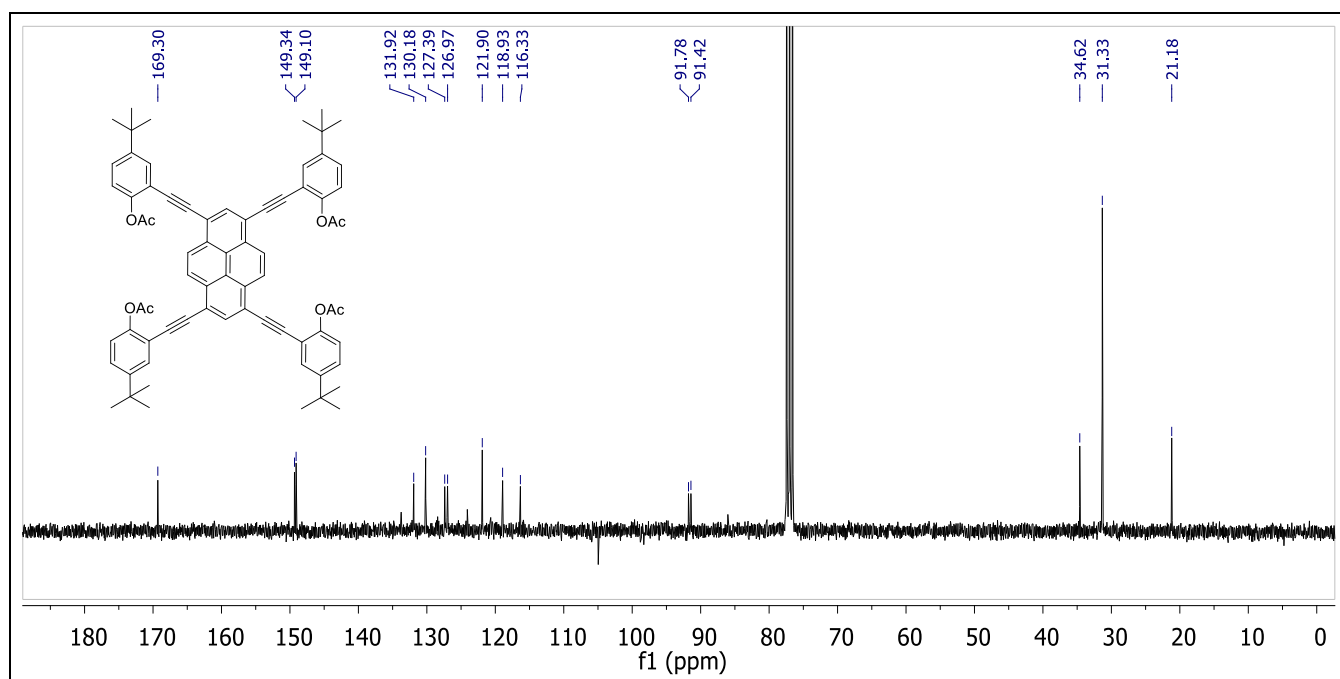

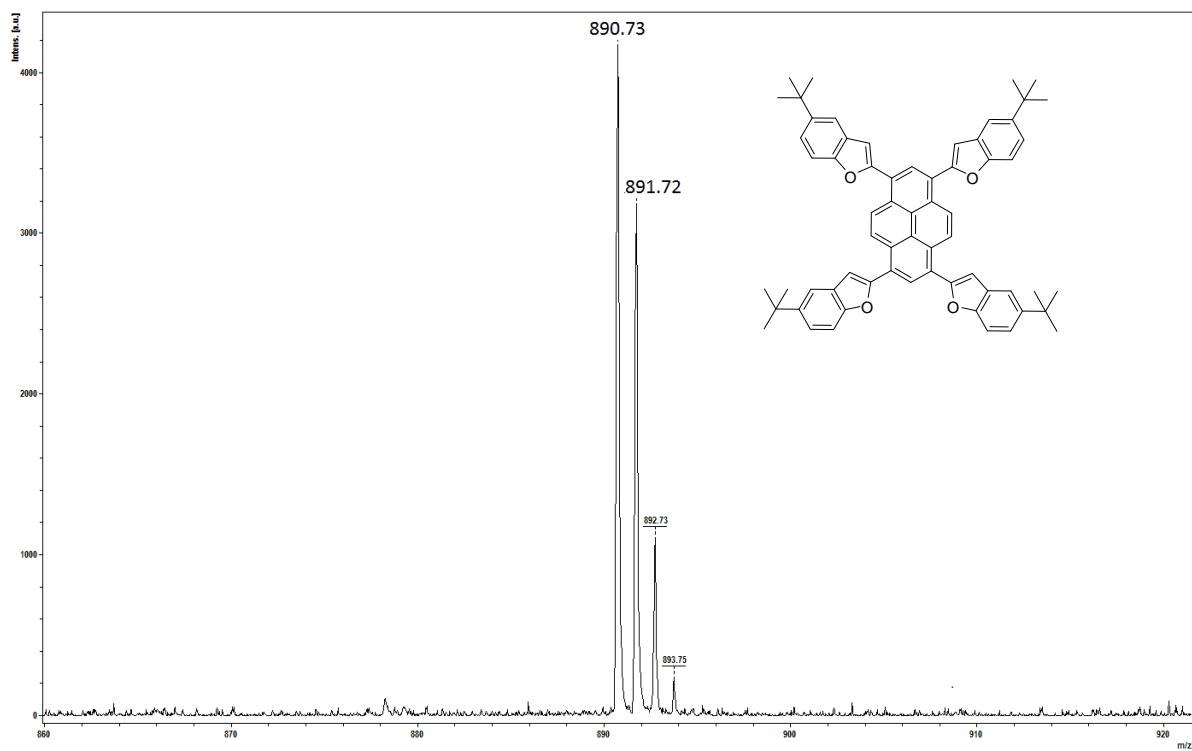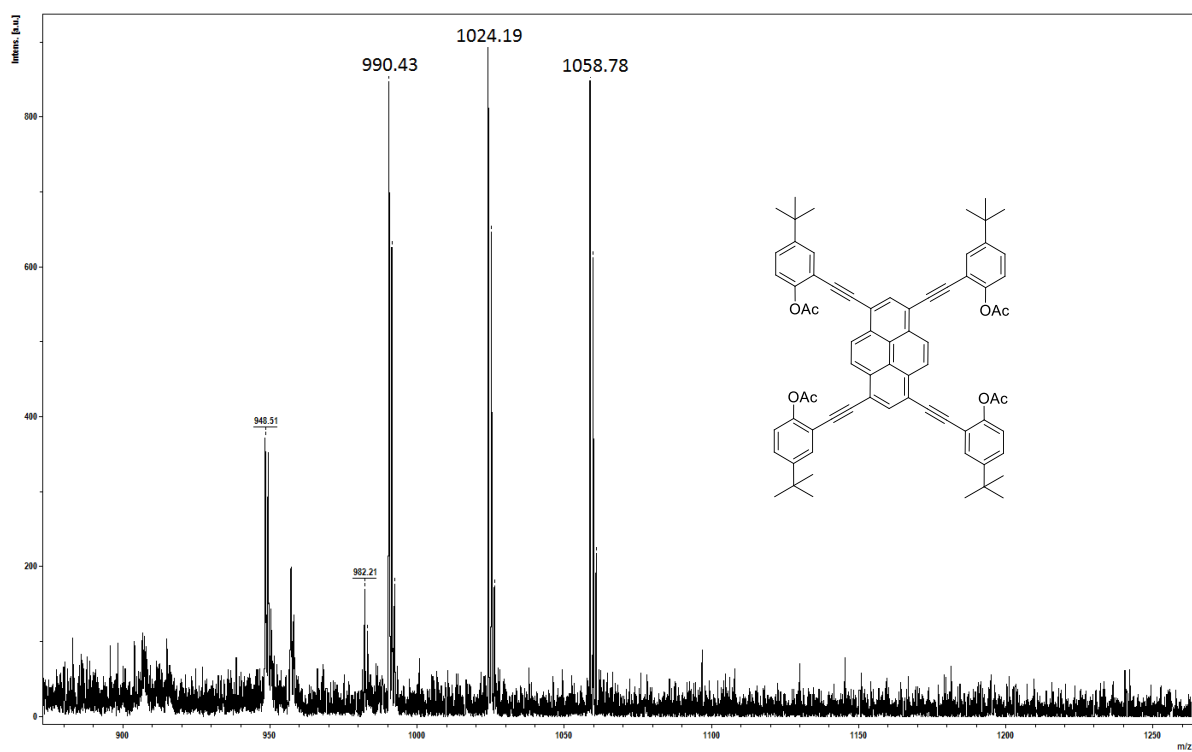

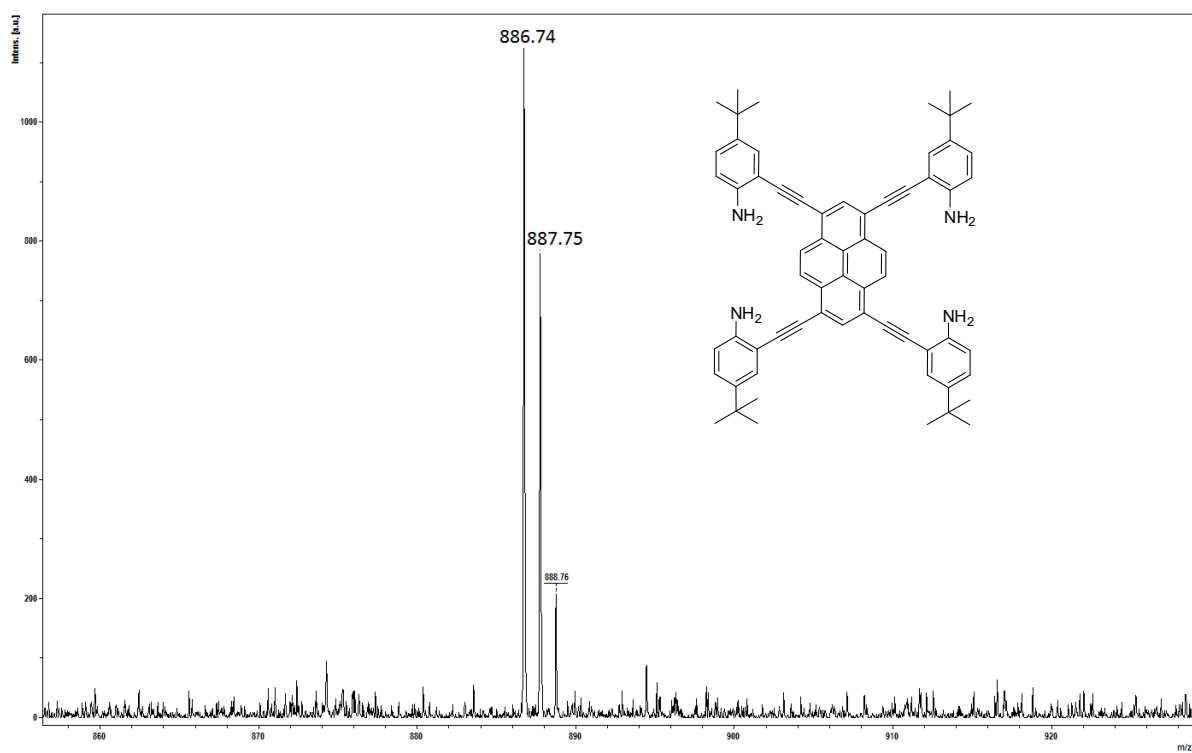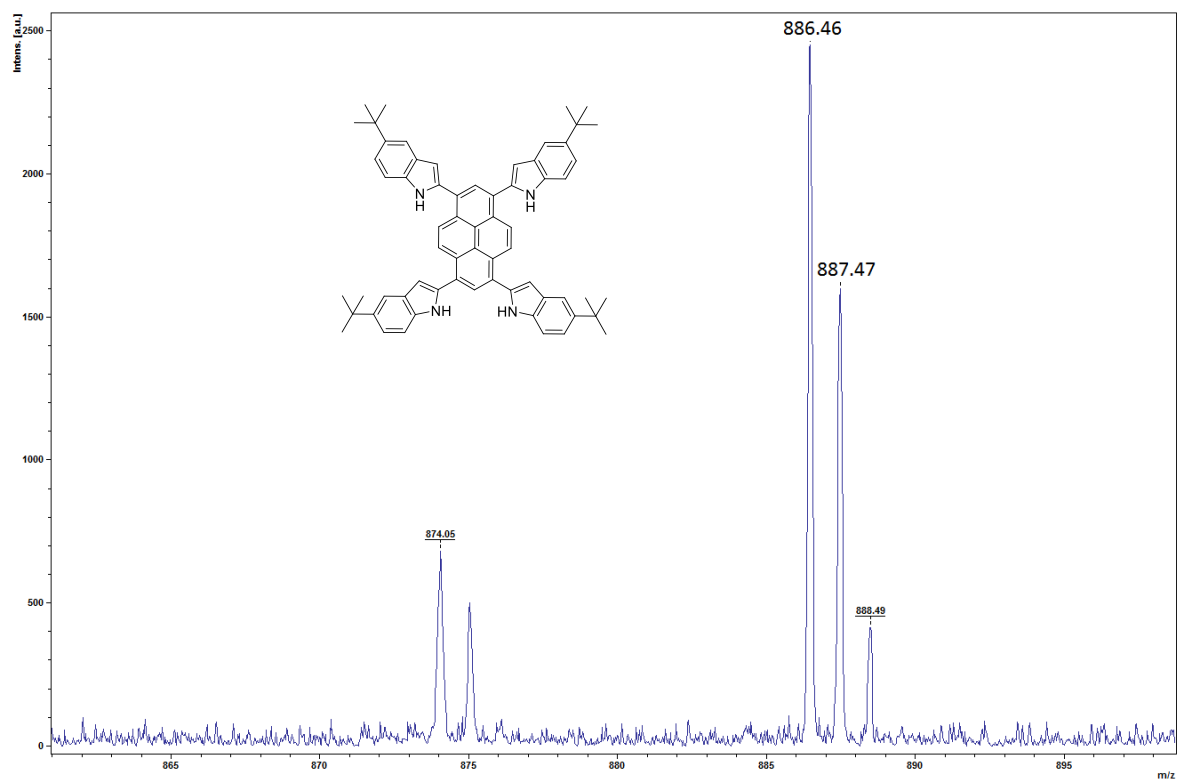

Supplement: c4ob01509f1.pdf [file c4ob01509f1.pdf]
